# Supplementary material for: Parallel and Intertwining Threads of Domestication in Allopolyploid Cotton
Source: PubMed Central journal article supplement (PMC8132148; doi:10.1002/advs.202003634), 2021-03-15

Supplemental Note 1, Figure 1

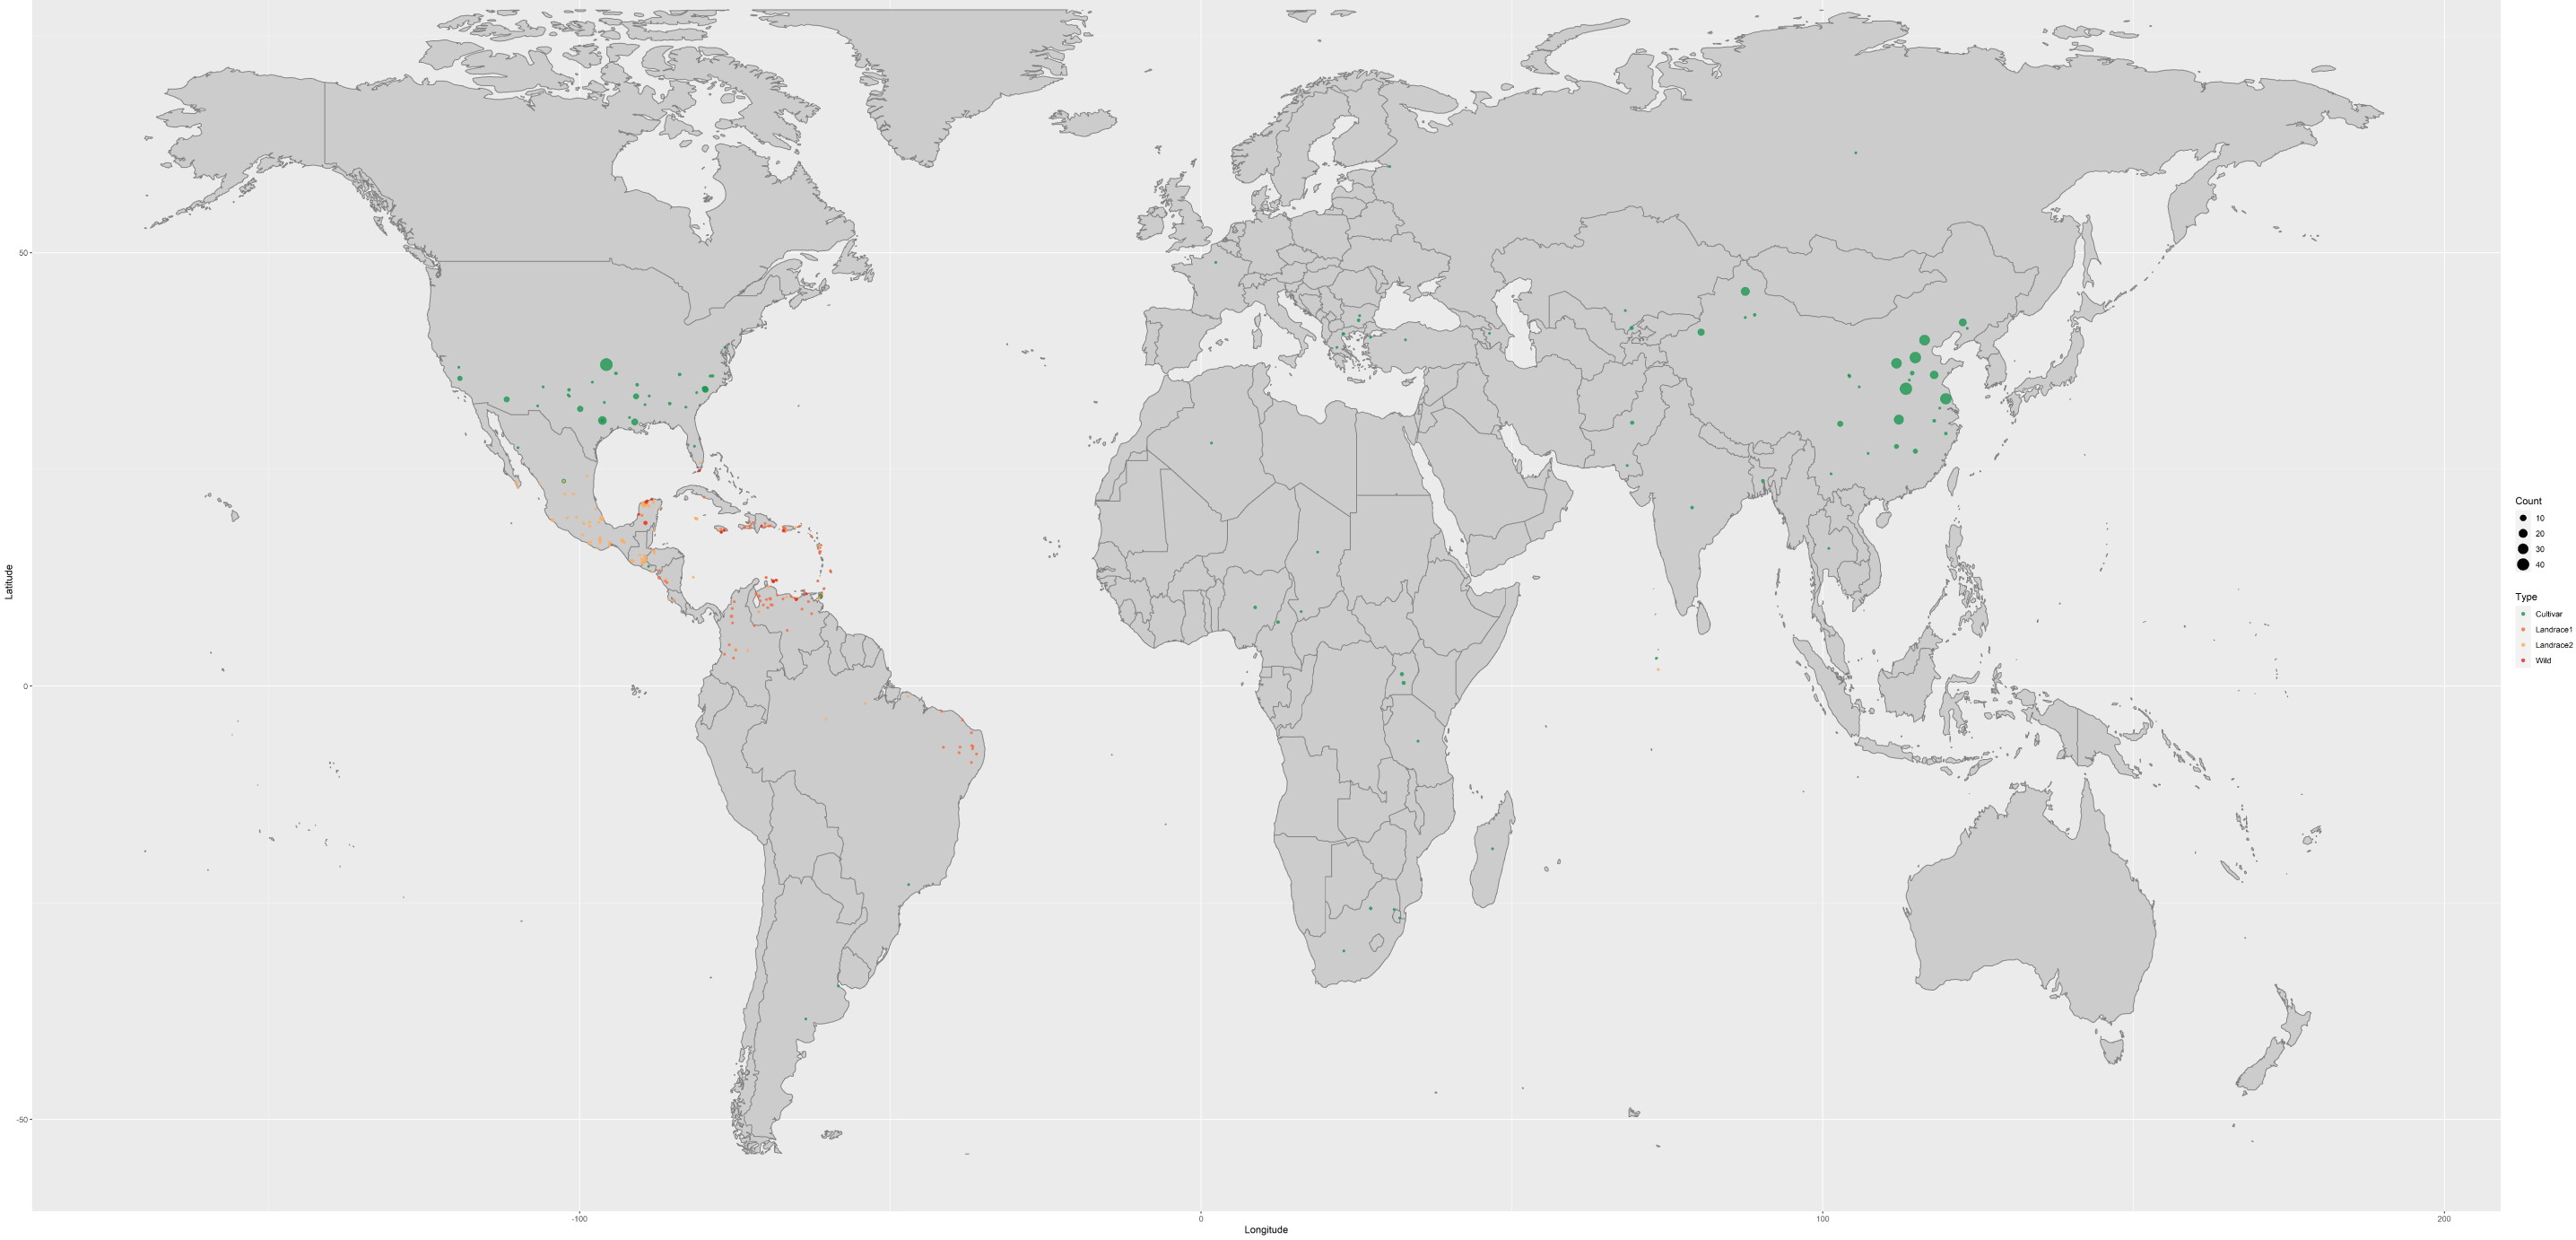

Supplemental Note 1, Figure 2

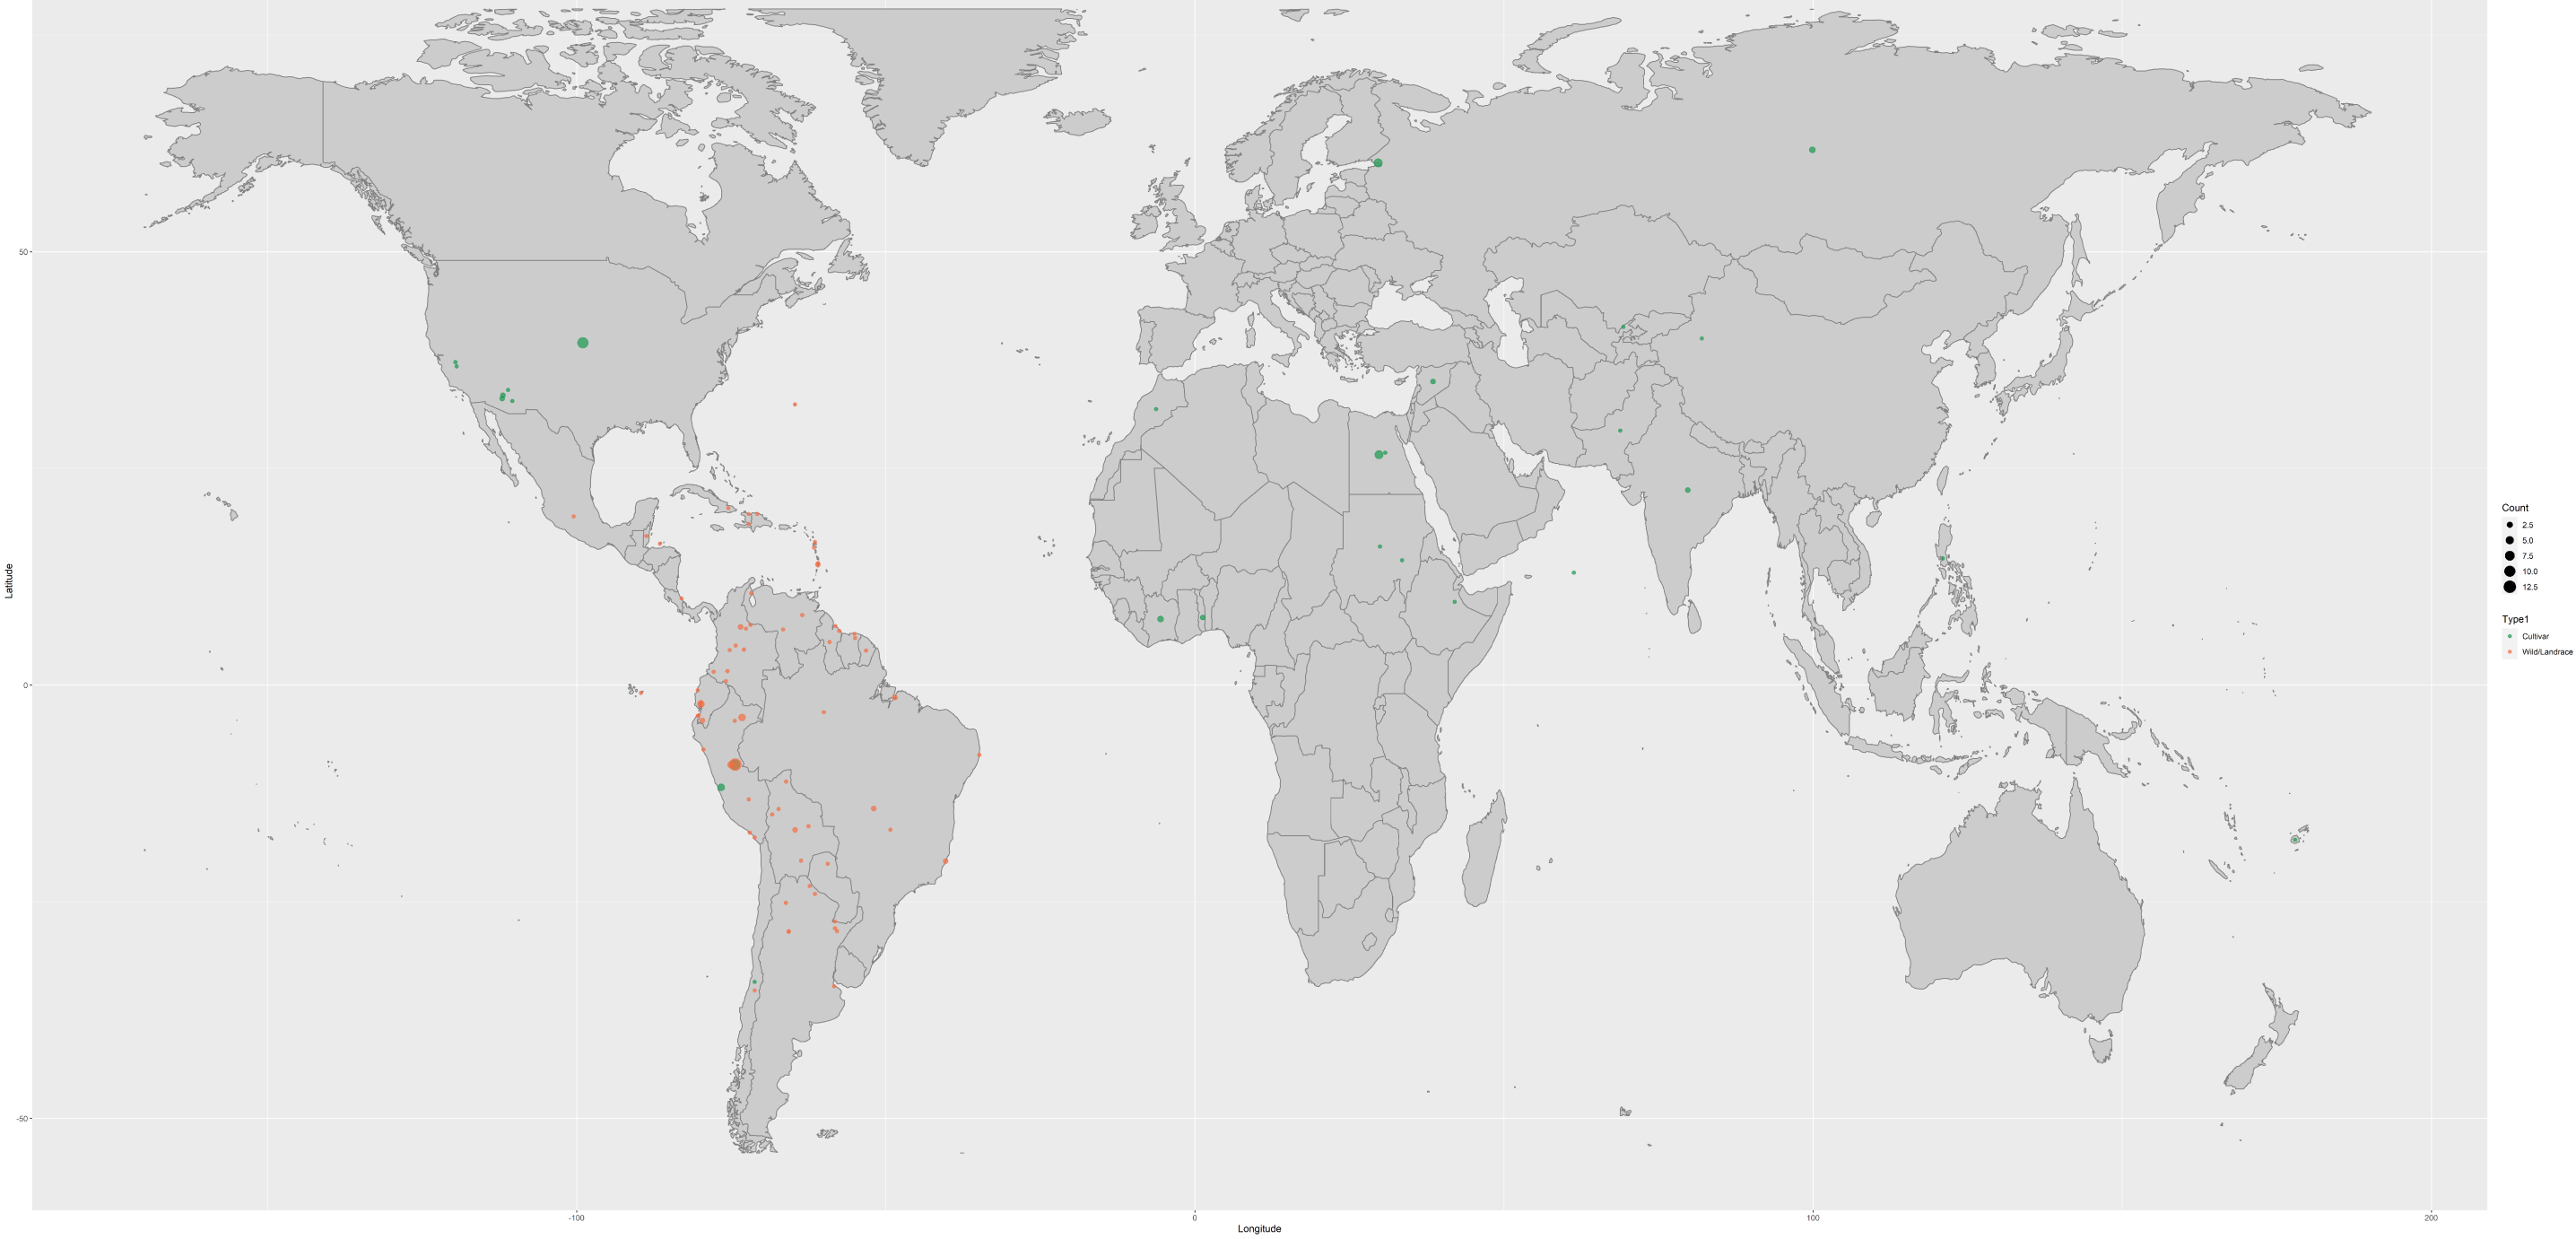

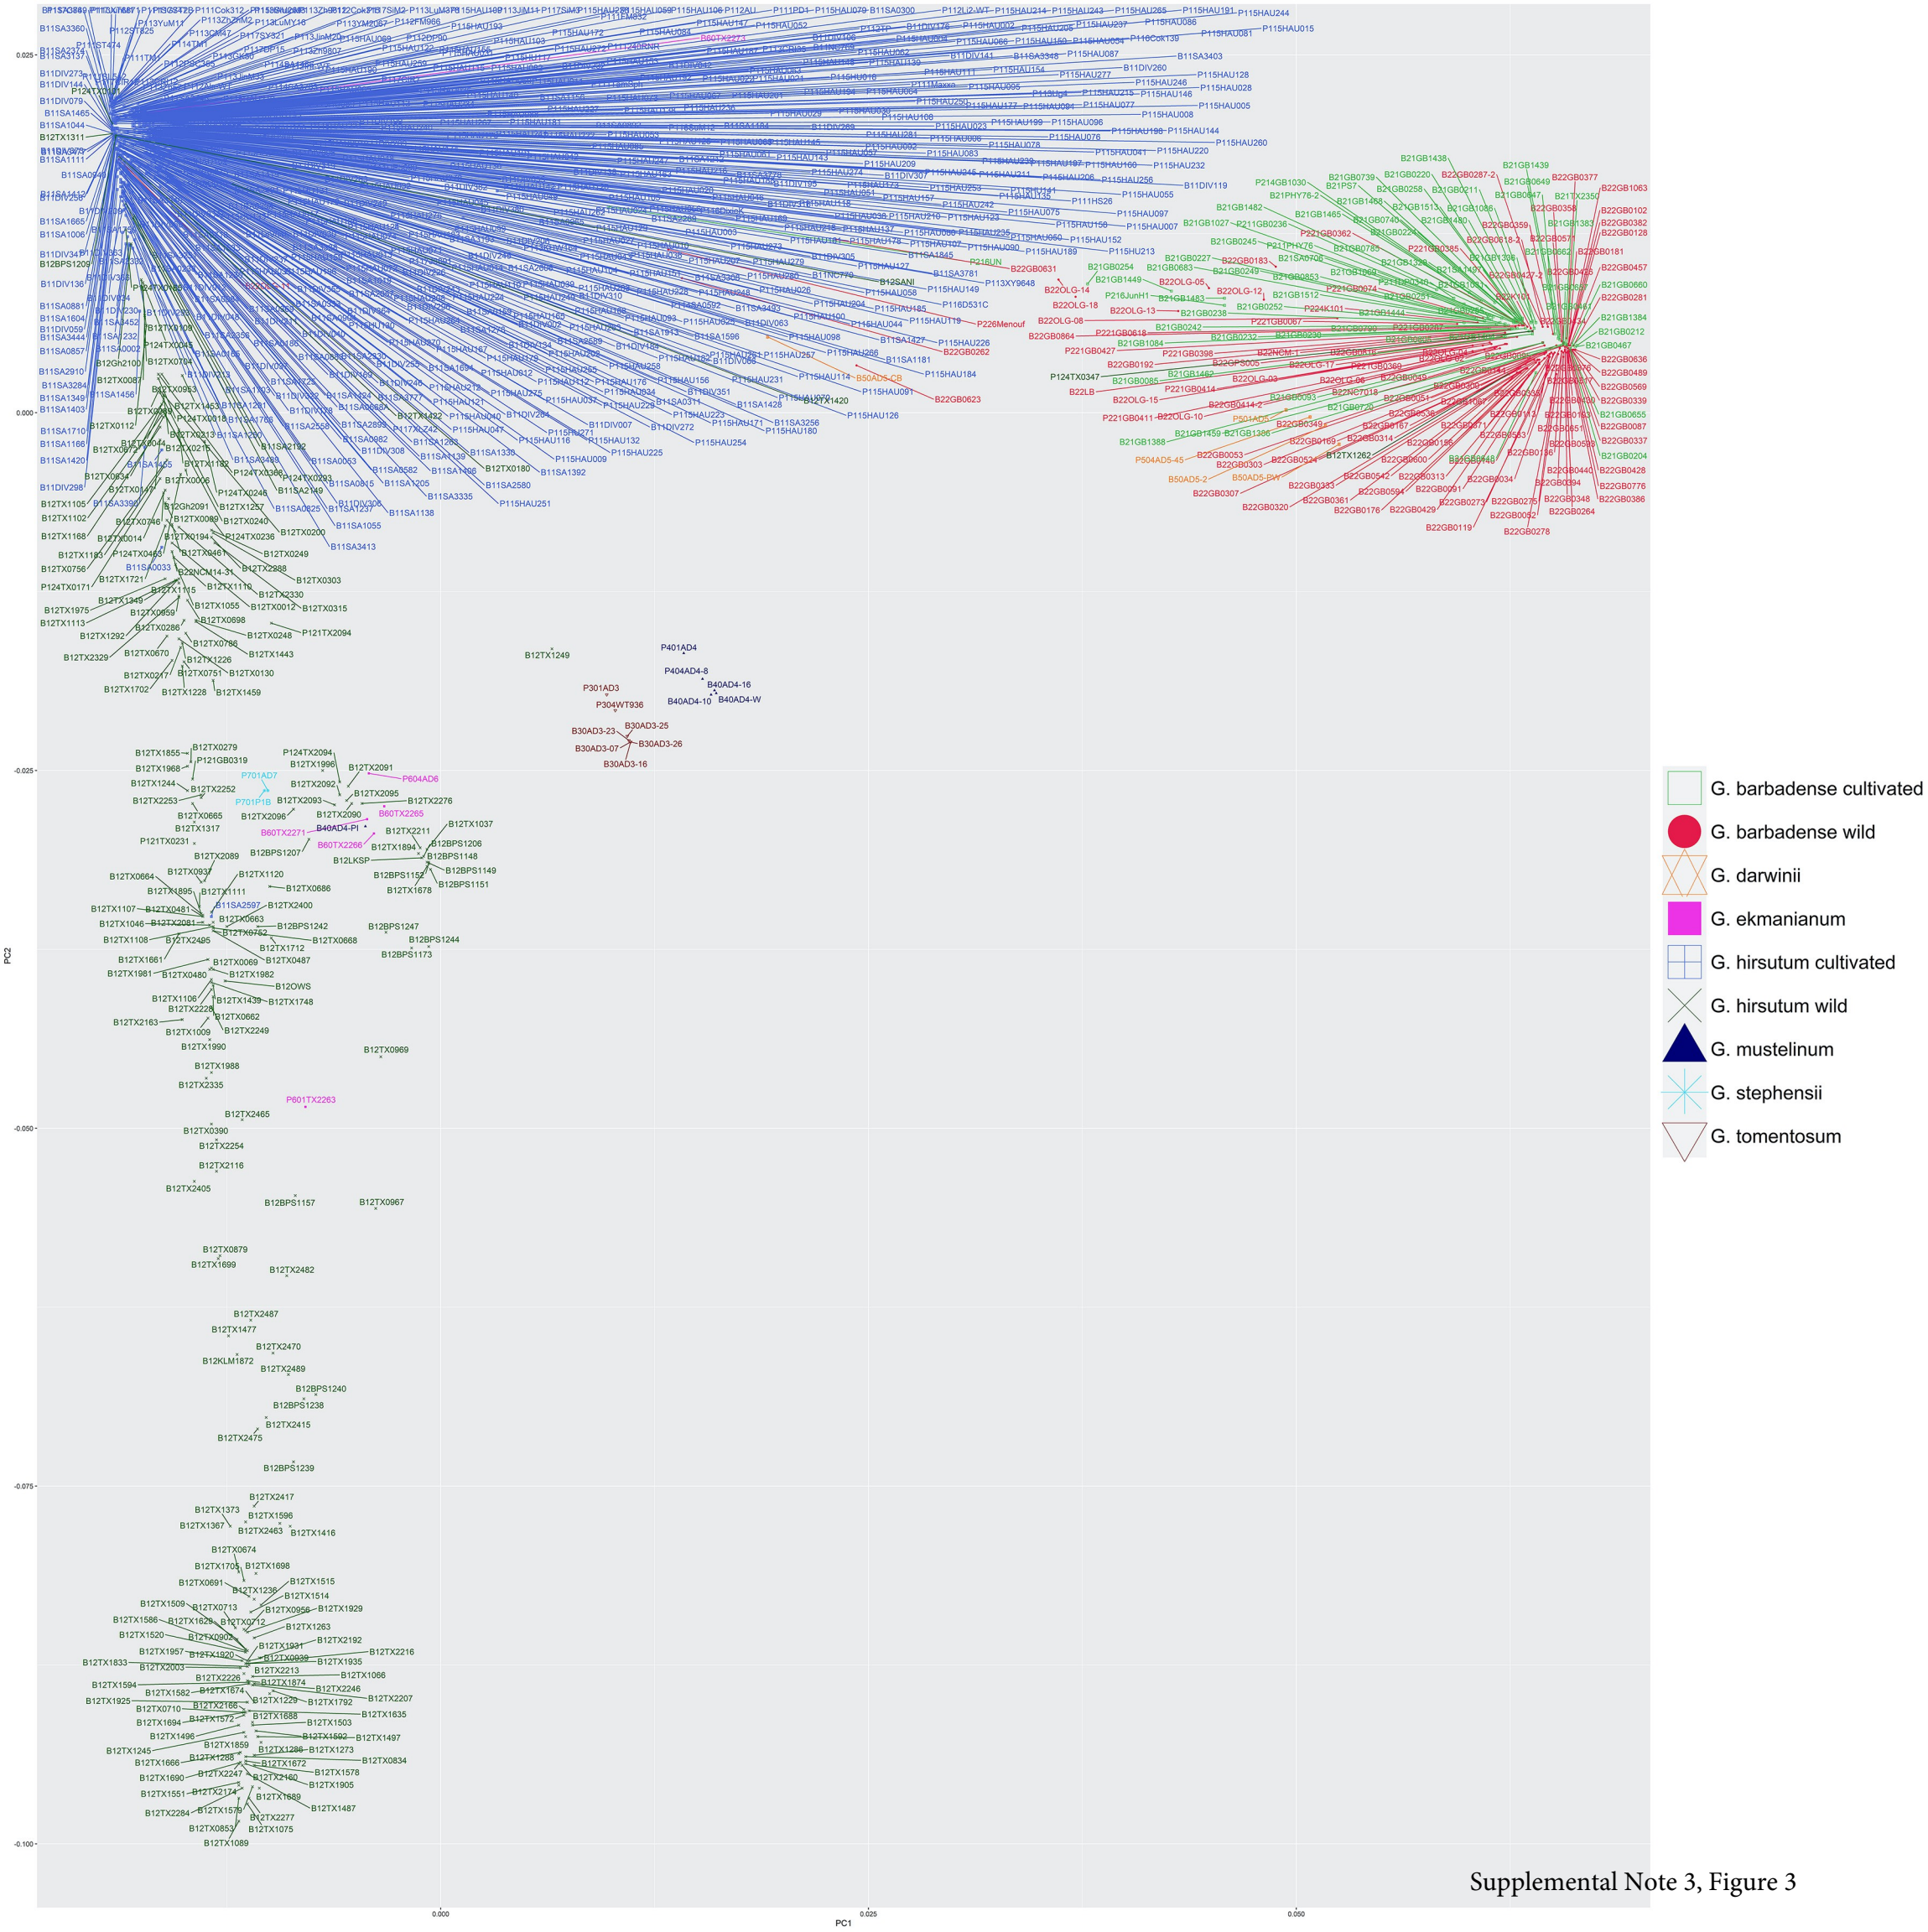

Supplemental Note 3, Figure 7

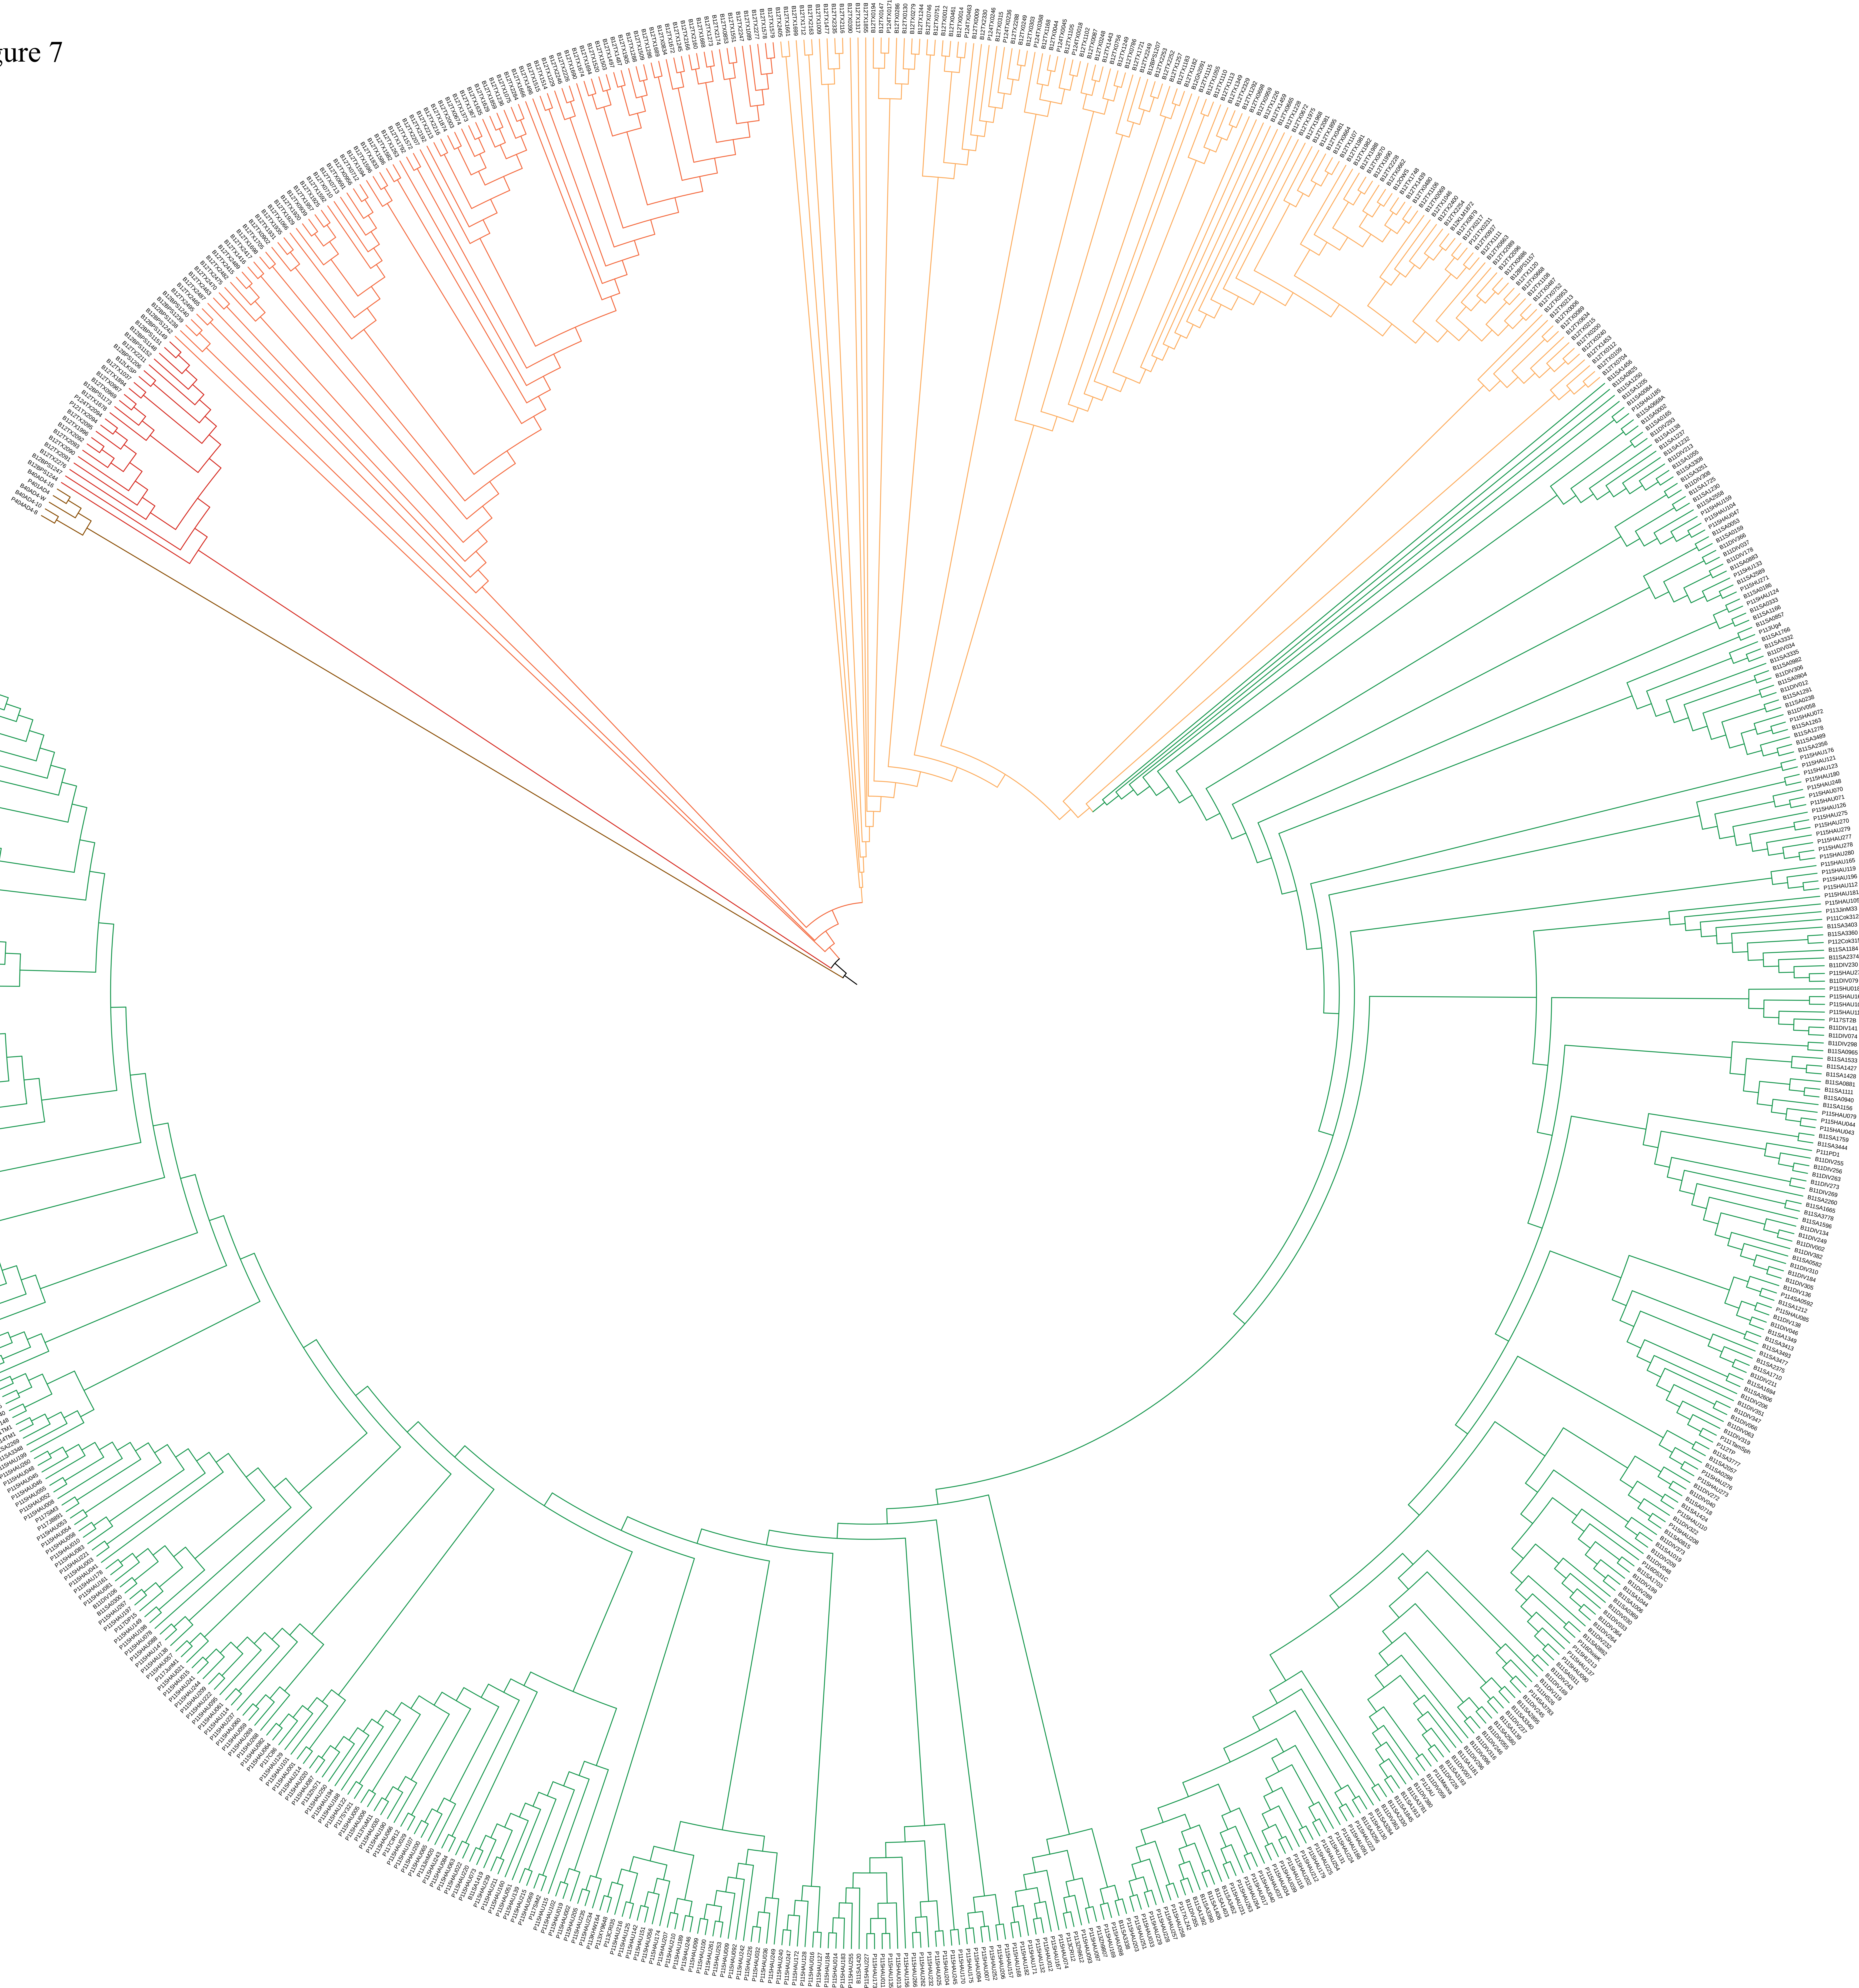

Supplement: ADVS-8-2003634-s002.pdf [file ADVS-8-2003634-s002.pdf]
